# Supplementary material for: The effects of molecular flexibility and substituents on conformational polymorphism in a series of 2,5-diamino-3,6-dicyanopyrazine dyes with highly flexible groups
Source: Royal Society of Chemistry journal article supplement (doi:10.1039/c5ce01004g), 2015-01-01

Supporting information for:

**The effects of molecular flexibility and substituents on conformational polymorphism in a series of 2,5-diamino-3,6-dicyanopyrazine dyes with highly flexible groups**

Authors: Yoko Akune<sup>1</sup>, Haruyuki Gontani<sup>1†</sup>, Risa Hirosawa<sup>1</sup>, Atsushi Koseki<sup>1‡</sup>, Shinya Matsumoto<sup>1</sup>

1. Graduate School of Environmental and Information Sciences, Yokohama National University, 79-7 Tokiwadai, Hodogaya-ku, Yokohama 240-8501, Japan.

<sup>†</sup>Present address: R&D Center, Kansai Paint Co., Ltd., 17-1, Higashi-Yawata 4-chome, Hiratsuka, Kanagawa 254-8562, Japan.

<sup>‡</sup>Present address: Fuji Factory, Toyocolor Co., Ltd., 400, Tenma, Fuji City, Shizuoka, 419-0205, Japan.

\*Corresponding author. Tel +81-45-339-3366; Fax +81-45-339-3345. *E-mail address:* smatsu@ynu.ac.jp (Shinya Matsumoto).

Table S1-S6.

Figure S1.

#### Table legends

Table S1. Solvent combinations for solvent diffusion method for crystallisation.

Table S2. Conformational similarities in all observed molecular conformations. The similarity was determined by RMSD calculated using the Molecule Overlay module of Mercury 3.3. RMSD is the root mean square deviation of distance between two molecular structures. The calculation was performed using the modified molecular conformations in which the terminal substituent on the benzyl group in each molecular conformation was converted to a hydrogen atom. RMSD values lower than 1 Å in this table are highlighted. These low values indicated that these pairs exhibited molecular similarity.

Table S3. List of compounds with the same refcode in the search for compounds containing the target fragment in the CSD. The structural similarity was evaluated using the Crystal Packing Similarity module of Mercury 3.3. The number of matched molecules was set as the number of molecules in common between the two crystal structures [19]. The size of the compared molecule cluster in the two structures was 15 molecules. RMSD is the root mean square deviation of distance between two crystal structures. PXRD is the powder pattern similarity. The two parameters for geometric tolerances were 20%.

Table S4. Incidences of polymorphism in the compounds with the target fragment in the CSD. Polymorph occurrence was altered by the type of covalent bond between *Z* and *X* in the target fragment (Fig. 3).

Table S5. Short contacts in all observed crystal structures.

Table S6. Lattice energy<sup>a</sup> of all forms, and total crystal energy<sup>b</sup> in the polymorphs of derivatives **2** and **3**.

#### Figure legend

Figure S1. DSC traces of the crystal forms in the derivatives **1–5**. (a) **1O**, (b) **2R** and **2Y**, (c) **3R** and **3Y**, (d) **4Y**, and (e) **5O**.

Table S1. Solvent combinations for solvent diffusion method for crystallisation.

|            |                                      |            |                                      |
|------------|--------------------------------------|------------|--------------------------------------|
| <b>1O</b>  | CHCl <sub>3</sub> / <i>n</i> -hexane | <b>3R</b>  | CHCl <sub>3</sub> / <i>n</i> -hexane |
| <b>2Y</b>  | THF/methanol                         | <b>3RV</b> | Benzene/ <i>n</i> -hexane            |
| <b>2R</b>  | THF/methanol                         | <b>4Y</b>  | 1,4-dioxane/methanol                 |
| <b>3Y</b>  | CHCl <sub>3</sub> /ethanol           | <b>4O</b>  | Benzene <sup>a</sup>                 |
| <b>3YO</b> | CHCl <sub>3</sub> /ethanol           | <b>5O</b>  | CHCl <sub>3</sub> <sup>a</sup>       |
| <b>3O</b>  | Benzene <sup>a</sup>                 |            |                                      |

<sup>a</sup> Slow evaporation at room temperature.

Table S2. Conformational similarities in all observed molecular conformations. The similarity was determined by RMSD calculated using the Molecule Overlay module of Mercury 3.3. RMSD is the root mean square deviation of distance between two molecular structures. The calculation was performed using the modified molecular conformations in which the terminal substituent on the benzyl group in each molecular conformation was converted to a hydrogen atom. RMSD values lower than 1 Å in this table are highlighted. These low values indicated that these pairs exhibited molecular similarity.

| RMSD/Å     | <b>2Y</b> | <b>2R</b> | <b>3Y</b> | <b>3YO</b> | <b>3R</b> | <b>4Y</b> | <b>5O</b> |
|------------|-----------|-----------|-----------|------------|-----------|-----------|-----------|
| <b>1O</b>  | 1.0565    | 1.3476    | 1.060     | 1.5879     | 1.3535    | 1.0404    | 1.0620    |
| <b>2Y</b>  | -         | 1.4171    | 0.0688    | 1.4729     | 1.3970    | 0.1334    | 0.2439    |
| <b>2R</b>  | -         | -         | 1.4375    | 1.2088     | 0.5252    | 1.3971    | 1.4111    |
| <b>3Y</b>  | -         | -         | -         | 1.4845     | 1.4147    | 0.1431    | 0.2283    |
| <b>3YO</b> | -         | -         | -         | -          | 1.4135    | 1.4711    | 1.3574    |
| <b>3R</b>  | -         | -         | -         | -          | -         | 1.4013    | 1.3765    |
| <b>4Y</b>  | -         | -         | -         | -          | -         | -         | 0.3354    |

Table S3. List of compounds with the same refcode in the search for compounds containing the target fragment in the CSD. The structural similarity was evaluated using the Crystal Packing Similarity module of Mercury 3.3. The number of matched molecules was set as the number of molecules in common between the two crystal structures [19]. The size of the compared molecule cluster in the two structures was 15 molecules. RMSD is the root mean square deviation of distance between two crystal structures. PXRD is the powder pattern similarity. The two parameters for geometric tolerances were 20%.

| Refcode                         | Number of<br>matched<br>molecule | RMSD/Å | PXRD<br>similarity | Occurrence of<br>polymorph |
|---------------------------------|----------------------------------|--------|--------------------|----------------------------|
| DICGED vs DICGED01              | 1                                | 0.355  | 0.92               | polymorphs                 |
| ICUBAL vs ICUBAL01              | 3                                | 0.889  | 0.924              | polymorphs                 |
| NUPJOX vs NUPJOX01              | 15                               | 0.017  | 1                  | No polymorph               |
| NUPJOX01 vs NUPJOX02            | 8                                | 1.229  | 0.934              | polymorphs                 |
| TIBGAN vs TIBGAN01              | 4                                | 0.572  | 0.948              | polymorphs                 |
| IMUQEM vs IMUQEM01              | 3                                | 0.993  | 0.998              | polymorphs                 |
| ESAHUB vs ESAHUB01              | 15                               | 0.094  | 0.996              | No polymorph               |
| KEGVAV vs KEGVAV01              | 15                               | 0      | 1                  | No polymorph               |
| NALWUS vs NALWUS02              | 15                               | 0.174  | 0.990              | No polymorph               |
| NANSUR vs NANSUR01              | 15                               | 0.043  | 0.999              | No polymorph               |
| NODQAY vs NODQAY01 <sup>a</sup> | -                                | -      | -                  | No polymorph               |
| TBENZA vs TBENZA02              | 15                               | 0.123  | 0.995              | No polymorph               |
| EBULES vs EBULES01              | 15                               | 0.072  | 0.996              | No polymorph               |
| UDEVUU vs UDEVUU01              | 15                               | 0      | 1                  | No polymorph               |
| VEXRIZ vs VEXRIZ01              | 15                               | 0.071  | 0.997              | No polymorph               |
| VUKBAE vs VUKBAE01 <sup>b</sup> | -                                | -      | -                  | No polymorph               |
| ZAWSUL vs ZAWSUL01              | 15                               | 0.030  | 0.998              | No polymorph               |
| JUKTEO vs JUKTEO01              | 15                               | 0.013  | 1                  | No polymorph               |

<sup>a</sup> The comparison between these structures could not be performed because the crystal structures were disordered. The lattice parameters between these structures are equal; thus, the relationship between these structures was considered non-polymorphic.

<sup>b</sup> The comparison between these structures could not be performed. In VUKBAE, hydrogens were not present, while the position of hydrogen was fixed in VUKBAE01. The lattice parameters between these structures are quite similar; thus, the relationship between these structures was considered non-polymorphic.

Table S4. Incidences of polymorphism in the compounds with the target fragment in the CSD. Polymorph occurrence was altered by the type of covalent bond between *Z* and *X* in the target fragment (Fig. 3).

|                                              | Covalent bond between <i>Z</i> and <i>X</i> |                                       |                      |
|----------------------------------------------|---------------------------------------------|---------------------------------------|----------------------|
|                                              | Single bond                                 | Non-aromatic double bond <sup>a</sup> | Aromatic double bond |
| Number of polymorphic compounds <sup>b</sup> | 3 (1%)                                      | 0 (0%)                                | 2 (6%)               |
| Total compounds                              | 285                                         | 63                                    | 33                   |

<sup>a</sup> The double bonds in this group excluded aromatic double bonds.

<sup>b</sup> The value in parentheses is the incidence of polymorphism.

Table S5. Short contacts in all observed crystal structures.

|            | Packing structures | Interactions                               | Distance ( $d/D$ ) <sup>a</sup> | $\theta$ <sup>b</sup> | Symmetry operation                           |
|------------|--------------------|--------------------------------------------|---------------------------------|-----------------------|----------------------------------------------|
| <b>1O</b>  | Intra-1D column    | C-H <sub>ph2</sub> ...N <sub>CN</sub>      | 2.560/3.618(3)                  | 163.6                 | $x, \pm 1+y, z$                              |
|            | Inter-1D column    | C-H <sub>CH2</sub> ... $\pi$ <sub>ph</sub> | 2.745/3.673                     | 143.0                 | $x, 1-y, \pm 1/2+z$                          |
|            |                    | C-H <sub>ph4</sub> ...C <sub>ph3</sub>     | 2.827/3.820(5)                  | 151.5                 | $x, 1-y, \pm 1/2+z$                          |
|            |                    | C-H <sub>ph4</sub> ... H <sub>ph3</sub> -C | 2.116/3.956(6)                  | 125.7/153.9           | $x, -y, \pm 1/2+z$                           |
|            |                    | C-H <sub>ph4</sub> ...C <sub>ph3</sub>     | 2.890/3.956(6)                  | 166.3                 | $x, -y, \pm 1/2+z$                           |
|            |                    | C-H <sub>ph3</sub> ...H <sub>ph3</sub> -C  | 2.226/4.180(6)                  | 163.5/144.5           | $x, 2-y, \pm 1/2+z$                          |
|            |                    | C-H <sub>ph4</sub> ... H <sub>ph4</sub> -C | 2.387/4.004(6)                  | 125.7/125.7           | $-x, y, 1/2-z$                               |
|            |                    | C-H <sub>CH2</sub> ...C <sub>ph3</sub>     | 2.768/3.783(5)                  | 155.0                 | $-x, 1-y, -z$                                |
|            |                    | C-H <sub>ph3</sub> ... $\pi$ <sub>ph</sub> | 2.688/3.653                     | 147.5                 | $-x, 1-y, -z$                                |
|            |                    | C-H <sub>ph4</sub> ...C <sub>ph3</sub>     | 2.768/3.803(8)                  | 158.7                 | $1/2-x, \pm 1/2+y, 1/2-z$                    |
| <b>2Y</b>  | Inter-1D column    | C-H <sub>ph3</sub> ...N <sub>CN</sub>      | 2.478/3.419(3)                  | 143.9                 | $x, 1-y, \pm 1/2+z$                          |
|            |                    | C-H <sub>Me</sub> ... H <sub>Me</sub> -C   | 2.166/3.858(3)                  | 129.4/129.4           | $1-x, y, 2.5-z$                              |
|            |                    | C-H <sub>ph2</sub> ...H <sub>ph2</sub> -H  | 2.181/4.075(3)                  | 138.4/138.4           | $1-x, 1-y, 2-z$                              |
| <b>2R</b>  | Intra-1D column    | C-H <sub>ph2</sub> ...N <sub>CN</sub>      | 2.638/3.488(8)                  | 134.4                 | $\pm 1+x, y, z$                              |
|            |                    | C-H <sub>ph2</sub> ...N <sub>CN</sub>      | 2.538/3.485(8)                  | 144.7                 | $\pm 1-x, 1-y, 1-z$                          |
|            |                    | C-H <sub>Me</sub> ...C <sub>ph2</sub>      | 2.881/3.665(8)                  | 128.9                 | $\pm 1+x, y, z$                              |
|            |                    | C-H <sub>Me</sub> ...C <sub>ph3</sub>      | 2.862/3.782(9)                  | 142.2                 | $\pm 1+x, y, z$                              |
|            | Inter-1D column    | C-H <sub>Me</sub> ...H <sub>ph3</sub> -C   | 2.133/3.92(1)                   | 127.6/167.8           | $-1+x, y, 1+z$<br>$1+x, y, -1+z$             |
|            |                    | C-H <sub>Me</sub> ...N <sub>CN</sub>       | 2.732/3.566(9)                  | 133.2                 | $x, y, \pm 1+z$                              |
|            |                    | C-H <sub>Me</sub> ...C <sub>ph3</sub>      | 2.892/3.98(1)                   | 173.3                 | $-1+x, 1/2-y, 1/2+z$<br>$1+x, 1/2-y, -1/2+z$ |
| <b>3Y</b>  | Inter-1D column    | C-H <sub>ph3</sub> ...N <sub>CN</sub>      | 2.500/3.371(3)                  | 136.1                 | $x, 1-y, \pm 1/2+z$                          |
|            |                    | C-H <sub>ph2</sub> ...H <sub>ph2</sub> -C  | 2.204/4.091(4)                  | 138.0/138.0           | $-x, 1-y, 1-z$                               |
|            |                    | C-Cl...H <sub>CH2</sub>                    | 2.879/3.921(3)                  | 160.2                 | $-x, -y, 1-z$                                |
| <b>3YO</b> | Intra-1D column    | C-H <sub>ph2</sub> ...N <sub>CN</sub>      | 2.723/3.780(5)                  | 163.6                 | $-1+x, y, z$                                 |
|            | Inter-1D           | C-Cl...N <sub>CN</sub>                     | -3.181(3)                       | 169.6(1)              | $\pm 1.5+x, 1/2-y, 1/2+z$                    |

|           |                    |                                           |                |                   |                                                    |
|-----------|--------------------|-------------------------------------------|----------------|-------------------|----------------------------------------------------|
|           | column             | C-H <sub>ph3</sub> ...C <sub>py</sub>     | 2.864/3.787(4) | 142.5             | -1/2+x, 1/2-y, 1/2+z,<br>1/2+x, 1/2-y, -1/2+z      |
|           |                    | C-H <sub>ph3</sub> ...C <sub>CN</sub>     | 2.844/3.605(4) | 127.0             | -1/2+x, 1/2-y, 1/2+z,<br>1/2+x, 1/2-y, -1/2+z      |
|           |                    | C-H <sub>ph3</sub> ...N <sub>py</sub>     | 2.508/3.567(3) | 163.8             | -1/2+x, 1/2-y, 1/2+z,<br>1/2+x, 1/2-y, -1/2+z      |
|           |                    | C-H <sub>ph3</sub> ... $\pi_{ph}$         | 2.581/3.657    | 169.38            | 1/2+x, 1/2-y, 1/2+z,<br>-1/2+x, 1/2-y, -1/2+z      |
| <b>3R</b> | Inter-1D<br>column | C-H <sub>ph2</sub> ...Cl                  | 2.714/3.650(2) | 143.8             | 1/2-x, $\pm 1/2+y$ , -1/2-z                        |
|           |                    | C-H <sub>CH2</sub> ...N <sub>CN</sub>     | 2.586/3.373(2) | 128.5             | -1/2-x, $\pm 1/2+y$ , -1/2-z                       |
|           |                    | C-H <sub>ph3</sub> ...Cl                  | 2.884/3.774(3) | 139.1             | -1/2-x, -1/2+y, -1/2-z                             |
|           |                    | C <sub>CN</sub> ...Cl                     | -/3.418        | 83.7(1)/107.97(9) | 1/2-x, $\pm 1/2+y$ , -1/2-z                        |
|           |                    | C-H <sub>ph3</sub> ...N <sub>CN</sub>     | 2.531/3.562(4) | 157.7             | 1/2-x, $\pm 1/2+y$ , -1/2-z                        |
|           |                    | C-H <sub>ph3</sub> ...H <sub>ph2</sub> -C | 2.373/4.279(4) | 145.3/141.8       | -1/2-x, $\pm 1/2+y$ , -1/2-z                       |
|           |                    | C-H <sub>ph3</sub> ...H <sub>CN2</sub> -C | 2.317/3.894(3) | 124.0/116.4       | -1/2-x, $\pm 1/2+y$ , -1/2-z                       |
|           |                    | C-H <sub>ph2</sub> ...Cl                  | 2.913/3.700(3) | 129.3             | -1-x, -1-y, -z                                     |
|           |                    | C-H <sub>ph2</sub> ... $\pi_{ph}$         | 2.794/3.792    | 152.3             | -x, -1-y, -z                                       |
| <b>4Y</b> | Inter-1D<br>column | C-H <sub>ph3</sub> ...N <sub>CN</sub>     | 2.371/3.371(8) | 151.9             | -1/2+x, -1/2-y,<br>1/2+z,<br>1/2+x, -1/2-y, -1/2+z |
|           |                    | C-H <sub>ph3</sub> ...C <sub>ph3</sub>    | 2.900/3.927(8) | 157.4             | 1.5-x, $\pm 1/2+y$ , 1/2-z                         |
|           |                    | C-H <sub>ph3</sub> ...Br                  | 2.974/3.949(6) | 149.2             | 1.5-x, $\pm 1/2+y$ , 1/2-z                         |
|           |                    | C-H <sub>CH2</sub> ...Br                  | 2.973/3.987(6) | 155.0             | 1.5-x, $\pm 1/2+y$ , 1/2-z                         |
| <b>5O</b> | Intra-1D<br>column | C-N <sub>CN</sub> ...C <sub>CN</sub>      | -/3.242        | 81.4(2)/82.9(3)   | 1/2-x, 1.5-y, -z                                   |
|           |                    | C-H <sub>ph</sub> ...H <sub>ph</sub> -C   | 2.352/4.071(5) | 124.0/133.0       | x, $\pm 1+y$ , z                                   |
|           | Inter-1D<br>column | C-H <sub>ph</sub> ...N <sub>CN</sub>      | 2.562/3.427(5) | 135.8             | x, -1-y, -1/2+z                                    |
|           |                    | C-H <sub>CH2</sub> ...C <sub>ph</sub>     | 2.837/3.661(5) | 132.4             | 1/2-x, $\pm 1/2+y$ , 1/2-z                         |
|           |                    | C-H <sub>CH2</sub> ...C <sub>ph</sub>     | 2.722/3.670(5) | 145.4             | 1/2-x, $\pm 1/2+y$ , 1/2-z                         |
|           |                    | C-H <sub>ph</sub> ...C <sub>ph</sub>      | 2.760/3.631(6) | 136.8             | x, -y, $\pm 1/2+z$                                 |
|           |                    | C-H <sub>ph</sub> ...H <sub>ph</sub> -C   | 2.260/3.942(7) | 114.0/171.3       | x, -1-y, $\pm 1/2+z$                               |
|           |                    | C-H <sub>ph</sub> ...C <sub>ph</sub>      | 2.880/3.942(7) | 165.0             | x, -1-y, $\pm 1/2+z$                               |



|                                    |                |       |            |
|------------------------------------|----------------|-------|------------|
| C-H <sub>ph</sub> ⋯C <sub>ph</sub> | 2.778/3.730(5) | 146.0 | -x, -y, -z |
| C-H <sub>ph</sub> ⋯C <sub>ph</sub> | 2.621/3.613(4) | 151.1 | -x, -y, -z |

<sup>a</sup> *d* represents the H⋯A distance (Å), and *D* represents the D⋯A distance (Å).

<sup>b</sup> *θ* represents the D-H⋯A angle (°).

H<sub>phn</sub> is a hydrogen atom of the phenyl ring or naphthyl ring and n is the position on the phenyl ring. For example, H<sub>ph4</sub> represents the hydrogen in the 4-position of the phenyl ring. C<sub>phn</sub> is a carbon atom of the phenyl ring and n is the position on the phenyl ring.

H<sub>CH2</sub> is the hydrogen atoms of the methylene group, N<sub>CN</sub> is the nitrogen atom of a cyano group, and N<sub>py</sub> is a nitrogen atom of the pyrazine ring. π<sub>ph</sub> represents the centre of the phenyl ring. H<sub>Me</sub> is the hydrogen atoms of the methyl groups in derivative **2**.

Table S6. Lattice energy<sup>a</sup> of all forms, and total crystal energy<sup>b</sup> in the polymorphs of derivatives **2** and **3**.

|            | Lattice energy<br>[kcal/mol] | Relative conformational<br>energy <sup>c</sup> [kcal/mol] | Total energy <sup>b</sup><br>[kcal/mol] |
|------------|------------------------------|-----------------------------------------------------------|-----------------------------------------|
| <b>1O</b>  | -45.1                        | -                                                         | -                                       |
| <b>2Y</b>  | -51.4                        | 0.00                                                      | -51.4                                   |
| <b>2R</b>  | -53.8                        | 15.8                                                      | -38.0                                   |
| <b>3Y</b>  | -52.8                        | 1.27                                                      | -51.5                                   |
| <b>3YO</b> | -48.3                        | 0.00                                                      | -48.3                                   |
| <b>3R</b>  | -51.4                        | 1.28                                                      | -50.1                                   |
| <b>4Y</b>  | -57.9                        | -                                                         | -                                       |
| <b>5O</b>  | -67.5                        | -                                                         | -                                       |

<sup>a</sup> Lattice energy was calculated using the AA-CLP model.

<sup>b</sup> Total energy was estimated from the sum of the lattice energy and the relative conformational energy.

<sup>c</sup> Relative conformational energy was an energy difference from the conformational energy of the lowest-energy forms.

Figure S1. DSC traces of the crystal forms in the derivatives **1–5**. (a) **1O**, (b) **2R** and **2Y**, (c) **3R** and **3Y**, (d) **4Y**, and (e) **5O**.

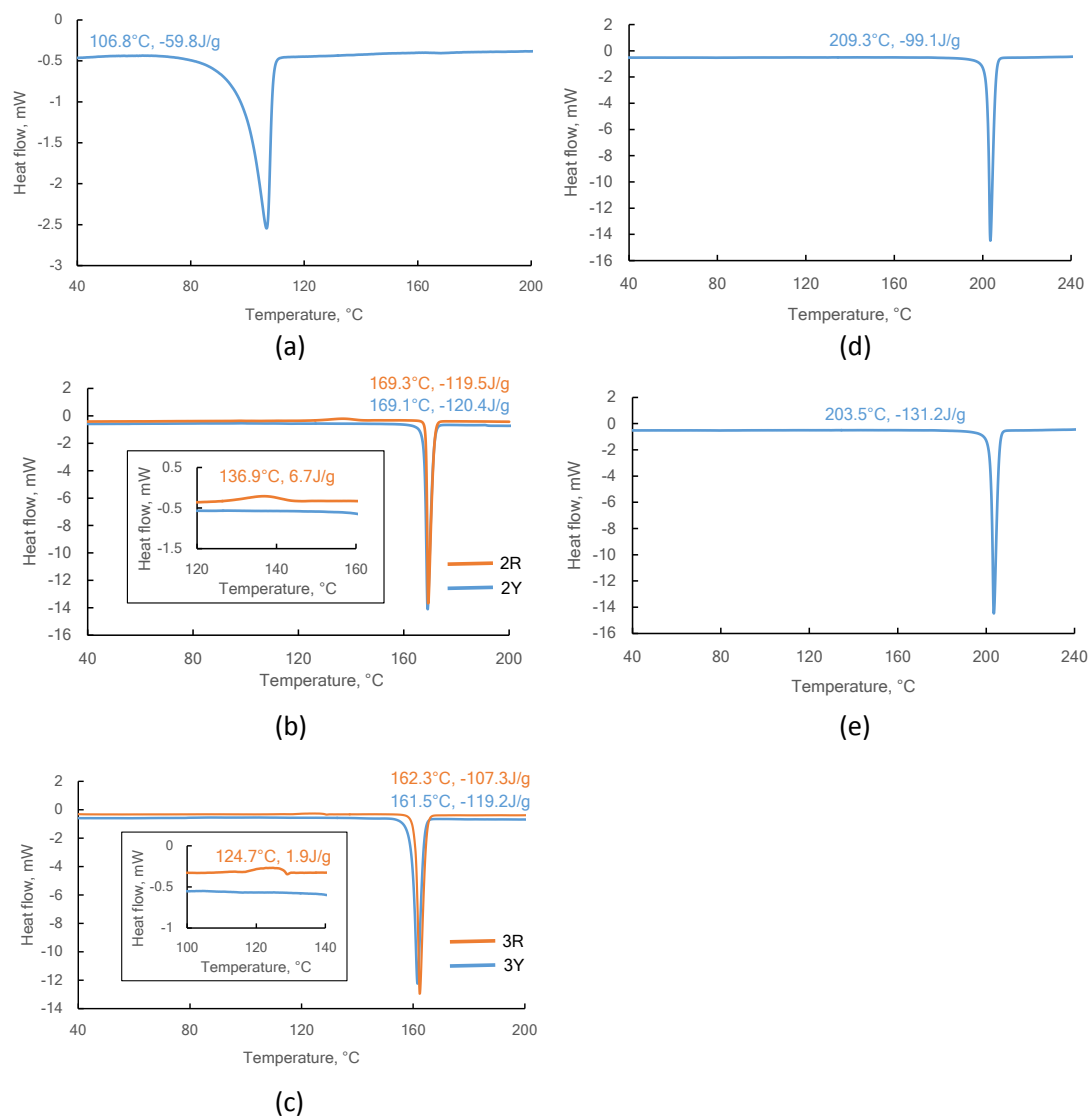

Supplement: c5ce01004g1.pdf [file c5ce01004g1.pdf]
